# Supplementary material for: Dynamic Changes in Brain Mesenchymal Perivascular Cells Associate with Multiple Sclerosis Disease Duration, Active Inflammation, and Demyelination
Source: PubMed Central journal article supplement — Stem Cells Transl Med. 2017 Sep 23;6(10):1840–51. doi: 10.1002/sctm.17-0028 (PMC6430046; doi:10.1002/sctm.17-0028), 2017-09-23
Supplement: SCT3-6-1840-s003.pdf [file SCT3-6-1840-s003.pdf]

Dynamic Changes in Brain Mesenchymal Perivascular Cells Associate with Multiple Sclerosis Disease Duration, Active Inflammation, and Demyelination.

Iacobaeus, Sugars et al.

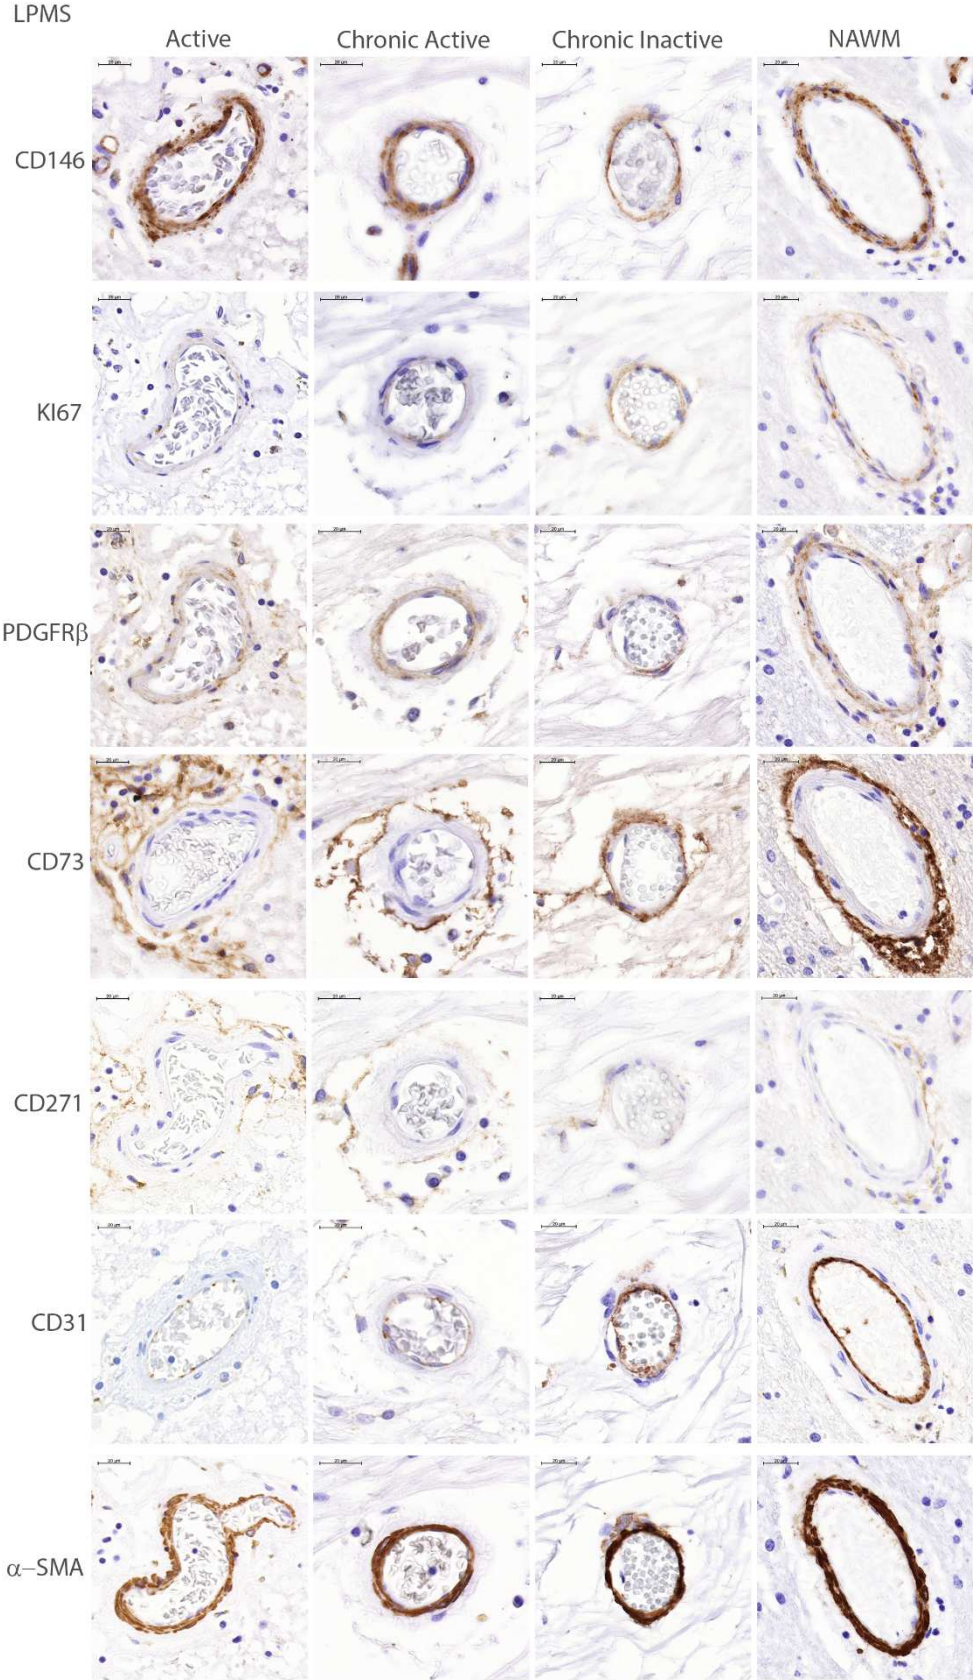

**Supplementary Figure 3.** Localization of all mesenchymal stromal cell (MSC)/pericyte markers (CD146, platelet-derived growth factor receptor beta (PDGFR $\beta$ ), CD73 and CD271), cell proliferation (Ki67), CD31 and alpha-smooth muscle actin ( $\alpha$ -SMA) in the late progressive multiple sclerosis (LPMS) cohort across the active, chronic active, chronic inactive lesions and normal appearing white matter (NAWM). MSC/pericyte markers localized to the perivascular regions in the adult human brain in chronic active regions lesions from LPMS. MSC markers, CD73, CD271 and PDGFR $\beta$  were found typically within the adventitial layer, whereas pericyte markers CD146 and PDGFR $\beta$  were localized abluminally to endothelial cells. Scale bars = 20 $\mu$ m.
