# Supplementary material for: Dynamic Changes in Brain Mesenchymal Perivascular Cells Associate with Multiple Sclerosis Disease Duration, Active Inflammation, and Demyelination
Source: PubMed Central journal article supplement — Stem Cells Transl Med. 2017 Sep 23;6(10):1840–51. doi: 10.1002/sctm.17-0028 (PMC6430046; doi:10.1002/sctm.17-0028), 2017-09-23
Supplement: SCT3-6-1840-s005.pdf [file SCT3-6-1840-s005.pdf]

**Supplementary Table 1.**

Number and type of tissue blocks included in the study

| <b>Sample code</b> | <b>Active lesions</b> | <b>Chronic active lesions</b> | <b>Chronic inactive lesions</b> | <b>NAWM</b> | <b>Healthy tissue</b> |
|--------------------|-----------------------|-------------------------------|---------------------------------|-------------|-----------------------|
| EPMS1              |                       |                               |                                 | 3           | n.a                   |
| EPMS2              |                       |                               | 1                               | 1           | n.a                   |
| EPMS3              |                       | 2                             |                                 |             | n.a                   |
| EPMS4              | 3                     | 2                             |                                 |             | n.a                   |
| EPMS5              | 1                     | 2                             |                                 |             | n.a                   |
| EPMS6              |                       | 1                             | 1                               | 1           | n.a                   |
| LPMS1              | 1                     | 1                             |                                 |             | n.a                   |
| LPMS2              |                       | 5                             | 2                               |             | n.a                   |
| LPMS3              | 2                     | 4                             | 1                               |             | n.a                   |
| LPMS4              | 1                     | 1                             |                                 |             | n.a                   |
| LPMS5              | 1                     | 1                             |                                 | 1           | n.a                   |
| LPMS6              | 1                     |                               |                                 | 2           | n.a                   |
| LPMS7              | 1                     | 3                             |                                 |             | n.a                   |
| LPMS8              | 2                     | 1                             |                                 |             | n.a                   |
| LPMS9              | 1                     |                               | 2                               |             | n.a                   |
| LPMS10             |                       |                               |                                 | 2           | n.a                   |
| LPMS11             |                       | 2                             |                                 | 1           | n.a                   |
| LPMS12             |                       |                               |                                 | 1           | n.a                   |
| HC1                | n.a                   | n.a                           | n.a                             | n.a         | 2                     |
| HC2                | n.a                   | n.a                           | n.a                             | n.a         | 2                     |
| HC3                | n.a                   | n.a                           | n.a                             | n.a         | 2                     |

|     |     |     |     |     |   |
|-----|-----|-----|-----|-----|---|
| HC4 | n.a | n.a | n.a | n.a | 2 |
| HC5 | n.a | n.a | n.a | n.a | 2 |
| HC6 | n.a | n.a | n.a | n.a | 2 |
| HC7 | n.a | n.a | n.a | n.a | 2 |
| HC8 | n.a | n.a | n.a | n.a | 2 |

**EPMS= early progressive MS, LPMS= late-stage progressive MS, HC= healthy control,  
NAWM= normal appearing white matter tissue, n.a= not applicable**
