# Supplementary material for: Dynamic Changes in Brain Mesenchymal Perivascular Cells Associate with Multiple Sclerosis Disease Duration, Active Inflammation, and Demyelination
Source: PubMed Central journal article supplement — Stem Cells Transl Med. 2017 Sep 23;6(10):1840–51. doi: 10.1002/sctm.17-0028 (PMC6430046; doi:10.1002/sctm.17-0028), 2017-09-23
Supplement: SCT3-6-1840-s006.pdf [file SCT3-6-1840-s006.pdf]

## Supplementary Table 2.

Primary antibody sources with corresponding methodological parameters

| <b>Primary Antibody</b>                       | <b>Source</b>                        | <b>Concentration</b> | <b>Serum</b> | <b>Antigen Retrieval Method*</b> | <b>Secondary Antibody</b>                                   |
|-----------------------------------------------|--------------------------------------|----------------------|--------------|----------------------------------|-------------------------------------------------------------|
| <b>CD4</b>                                    | rMAb ab133616<br>abcam               | 1:7,500              | Goat         | Basic                            | Biotinylated<br>Goat $\alpha$ rabbit<br>IgG<br>(VectorLabs) |
| <b>CD8 (144B)</b>                             | mMAb M7103<br>DAKO                   | 1:800                | Goat         | Basic                            | Biotinylated<br>Goat $\alpha$ mouse<br>IgG<br>(VectorLabs)  |
| <b>CD68<br/>Clone PG-M1</b>                   | mMAb M0876<br>DAKO                   | 1:20,000             | Goat         | Basic                            | Biotinylated<br>Goat $\alpha$ mouse<br>IgG<br>(VectorLabs)  |
| <b>CD146<br/>MCAM</b>                         | rPAb<br>SAB27012024<br>Sigma Aldrich | 1:5,000              | Goat         | Citrate                          | Biotinylated<br>Goat $\alpha$ rabbit<br>IgG<br>(VectorLabs) |
| <b>CD271<br/>NGFR5</b>                        | mMAb ab3125<br>abcam                 | 1:200                | Goat         | Citrate                          | Biotinylated<br>Goat $\alpha$ mouse<br>IgG<br>(VectorLabs)  |
| <b>CD73<br/>Clone 1D7</b>                     | mMAb<br>ab91086<br>abcam             | 1:20,000<br>1:1,800  | Goat         | Citrate                          | Biotinylated<br>Goat $\alpha$ mouse<br>IgG<br>(VectorLabs)  |
| <b>PDGFR<math>\beta</math><br/>Clone 28E1</b> | rMAb<br>#3169<br>Cell Signalling     | 1:750                | Goat         | Citrate                          | Biotinylated<br>Goat $\alpha$ rabbit<br>IgG<br>(VectorLabs) |
| <b>CD31<br/>Clone JC70A</b>                   | mMAb<br>M0823<br>DAKO                | 1:2,000              | Goat         | Basic                            | Biotinylated<br>Goat $\alpha$ mouse<br>IgG<br>(VectorLabs)  |
| <b><math>\alpha</math>SMA<br/>clone 1A4</b>   | mMAb<br>M0851<br>DAKO                | 1:50,000             | Goat         | Citrate                          | Biotinylated<br>Goat $\alpha$ mouse<br>IgG<br>(VectorLabs)  |

|                                             |                       |          |      |         |                                                             |
|---------------------------------------------|-----------------------|----------|------|---------|-------------------------------------------------------------|
| <b>KI67<br/>MIB-1</b>                       | mMAb<br>M7240<br>DAKO | 1:600    | Goat | Citrate | Biotinylated<br>Goat $\alpha$ mouse<br>IgG<br>(VectorLabs)  |
| <b>GFAP<br/>Clone 6F1</b>                   | mMAb<br>M0761<br>DAKO | 1:2,000  | Goat | Citrate | mMAb<br>M0761<br>DAKO                                       |
| <b>MBP</b>                                  | rPAb A0623<br>DAKO    | 1:10,000 | Goat | Citrate | Biotinylated<br>Goat $\alpha$ rabbit<br>IgG<br>(VectorLabs) |
| <b>HLA-DP, DQ<br/>&amp; DR<br/>(CR3/43)</b> | mMAb<br>M0761<br>DAKO | 1:20,000 | Goat | Citrate | mMAb<br>M0761<br>DAKO                                       |
| <b>Isotype mouse<br/>IgG</b>                | I-2000<br>VectorLabs  |          |      |         |                                                             |
| <b>Isotype rabbit<br/>IgG</b>               | I-1000<br>VectorLabs  |          |      |         |                                                             |

mMAb – mouse monoclonal antibody, rMAb – rabbit monoclonal antibody, rPAb – rabbit polyclonal antibody

\*Antigen retrieval

1. Citrate Buffer, pH6: Invitrogen 00-5001
2. Basic Buffer, pH9: R&D Systems CTS013

Isotype control images were used at the corresponding primary antibody concentrations. Representative images are shown for the lowest antibody dilution used for the respective isotypes (1:200 mouse and 1:750 rabbit). Mouse images are taken from LMS4, away from a

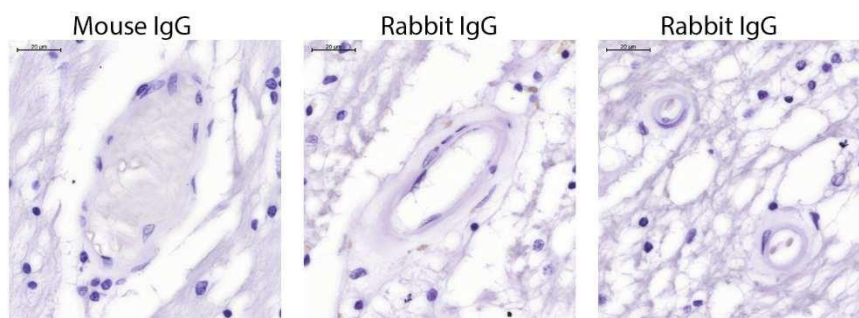

chronic active close to periventricular area and rabbit images from LMS3, within an active lesion.
