# Supplementary material for: Dynamic Changes in Brain Mesenchymal Perivascular Cells Associate with Multiple Sclerosis Disease Duration, Active Inflammation, and Demyelination
Source: PubMed Central journal article supplement — Stem Cells Transl Med. 2017 Sep 23;6(10):1840–51. doi: 10.1002/sctm.17-0028 (PMC6430046; doi:10.1002/sctm.17-0028), 2017-09-23
Supplement: SCT3-6-1840-s007.pdf [file SCT3-6-1840-s007.pdf]

### Supplementary Table 3

Summary of the statistical analyses using Generalized Estimating Equations with a gamma distribution and log-link performed in Stata version 14.

#### **Markers CD146, PDGFR $\beta$ , CD73, CD271 and Ki67**

Quantification of the total area stained / total pixel area for each stage and combination of MS lesion or healthy were determined from the image analysis CellProfiler analyses. The table shows the pixel-area fold changes (Fold-changes) with 95% confidence intervals for all MS lesion types compared against healthy tissue (Constant). Beneath the table are listed the intra-comparisons between early and late, and type of MS lesion, including fold-change and p-value.

Statistical significance was taken with a p-value of less than 0.05.

a = <0.001. b = <0.005, c = <0.01 and d = <0.05

#### **\*\*\* CD146 \*\*\***

| Group          | Total area | Fold change | Std. Err. | z            | P> z     | [95% Conf. Interval] |    |
|----------------|------------|-------------|-----------|--------------|----------|----------------------|----|
| Early Active   | .3741903   | .1423113    | -2.58     | <b>0.010</b> | .1775683 | .7885328             | c. |
| Early Chronic  | .0891688   | .0237233    | -9.09     | <b>0.000</b> | .052936  | .1502014             | a. |
| Early Inactive | .2058801   | .082201     | -3.96     | <b>0.000</b> | .0941365 | .4502674             | a. |
| Early NAWM     | .4189563   | .1088476    | -3.35     | <b>0.001</b> | .2517798 | .6971344             | a. |
| Late Active    | 1.298237   | .3694154    | 0.92      | 0.359        | .7432641 | 2.267591             |    |
| Late Chronic   | .762788    | .1583309    | -1.30     | 0.192        | .5078332 | 1.145741             |    |
| Late Inactive  | .1597918   | .0463702    | -6.32     | <b>0.000</b> | .090478  | .2822058             | a. |
| Late NAWM      | .3417577   | .0796881    | -4.60     | <b>0.000</b> | .2163927 | .5397518             | a. |
| _cons          | .0028281   | .0004151    | -39.98    | 0.000        | .0021211 | .0037708             |    |

|                                  | Fold-change | P-value      |    |
|----------------------------------|-------------|--------------|----|
| Early Active vs. Early Chronic   | 4.196       | <b>0.001</b> | a. |
| Early Active vs. Early Inactive  | 1.818       | 0.242        |    |
| Early Active vs. Early NAWM      | 0.893       | 0.783        |    |
| Early Active vs. Healthy         | 0.374       | <b>0.010</b> | c. |
| Early Active vs. Late Active     | 0.288       | <b>0.004</b> | b. |
| Early Active vs. Late Chronic    | 0.491       | 0.061        |    |
| Early Active vs. Late Inactive   | 2.342       | <b>0.048</b> | d. |
| Early Active vs. Late NAWM       | 1.095       | 0.818        |    |
| Early Chronic vs. Early Inactive | 0.433       | 0.053        |    |
| Early Chronic vs. Early NAWM     | 0.213       | <b>0.000</b> | a. |
| Early Chronic vs. Healthy        | 0.089       | <b>0.000</b> | a. |

|                                  |       |              |    |
|----------------------------------|-------|--------------|----|
| Early Chronic vs. Late Active    | 0.069 | <b>0.000</b> | a. |
| Early Chronic vs. Late Chronic   | 0.117 | <b>0.000</b> | a. |
| Early Chronic vs. Late Inactive  | 0.558 | 0.081        |    |
| Early Chronic vs. Late NAWM      | 0.261 | <b>0.000</b> | a. |
| Early Inactive vs. Early NAWM    | 0.491 | 0.098        |    |
| Early Inactive vs. Healthy       | 0.206 | <b>0.000</b> | a. |
| Early Inactive vs. Late Active   | 0.159 | <b>0.000</b> | a. |
| Early Inactive vs. Late Chronic  | 0.270 | <b>0.001</b> | a. |
| Early Inactive vs. Late Inactive | 1.288 | 0.571        |    |
| Early Inactive vs. Late NAWM     | 0.602 | 0.220        |    |
| Early NAWM vs. Healthy           | 0.419 | <b>0.001</b> | a. |
| Early NAWM vs. Late Active       | 0.323 | <b>0.000</b> | a. |
| Early NAWM vs. Late Chronic      | 0.549 | <b>0.021</b> | d. |
| Early NAWM vs. Late Inactive     | 2.622 | <b>0.003</b> | b. |
| Early NAWM vs. Late NAWM         | 1.226 | 0.468        |    |
| Healthy vs. Late Active          | 0.770 | 0.359        |    |
| Healthy vs. Late Chronic         | 1.311 | 0.192        |    |
| Healthy vs. Late Inactive        | 6.258 | <b>0.000</b> | a. |
| Healthy vs. Late NAWM            | 2.926 | <b>0.000</b> | a. |
| Late Active vs. Late Chronic     | 1.702 | 0.062        |    |
| Late Active vs. Late Inactive    | 8.125 | <b>0.000</b> | a. |
| Late Active vs. Late NAWM        | 3.799 | <b>0.000</b> | a. |
| Late Chronic vs. Late Inactive   | 4.774 | <b>0.000</b> | a. |
| Late Chronic vs. Late NAWM       | 2.232 | <b>0.001</b> | a. |
| Late Inactive vs. Late NAWM      | 0.468 | <b>0.014</b> | d. |

\*\*\* PDGFR $\beta$  \*\*\*

|                | Total area | Fold change | Std. Err. | z            | P> z     | [95% Conf. Interval] |    |
|----------------|------------|-------------|-----------|--------------|----------|----------------------|----|
| Group          |            |             |           |              |          |                      |    |
| Early Active   | 1.307601   | .287901     | 1.22      | 0.223        | .8493016 | 2.013207             |    |
| Early Chronic  | .2681479   | .0413007    | -8.55     | <b>0.000</b> | .1982762 | .3626422             | a. |
| Early Inactive | .257344    | .0594837    | -5.87     | <b>0.000</b> | .1635925 | .4048226             | a. |
| Early NAWM     | .6350058   | .09551      | -3.02     | <b>0.003</b> | .472879  | .8527178             | b. |
| Late Active    | 1.889018   | .3111848    | 3.86      | <b>0.000</b> | 1.367775 | 2.608901             | a. |
| Late Chronic   | .6452629   | .0775389    | -3.65     | <b>0.000</b> | .5098599 | .8166247             | a. |
| Late Inactive  | .643146    | .1080477    | -2.63     | <b>0.009</b> | .4627099 | .893944              | b. |
| Late NAWM      | 1.134148   | .1530968    | 0.93      | 0.351        | .8704974 | 1.477652             |    |
| _cons          | .0052858   | .0004491    | -61.70    | 0.000        | .0044749 | .0062436             |    |

|                                  | Fold-change | P-value |    |
|----------------------------------|-------------|---------|----|
| Early Active vs. Early Chronic   | 4.876       | 0.000   | a. |
| Early Active vs. Early Inactive  | 5.081       | 0.000   | a. |
| Early Active vs. Early NAWM      | 2.059       | 0.002   | b. |
| Early Active vs. Healthy         | 1.308       | 0.223   |    |
| Early Active vs. Late Active     | 0.692       | 0.137   |    |
| Early Active vs. Late Chronic    | 2.026       | 0.001   | a. |
| Early Active vs. Late Inactive   | 2.033       | 0.004   | b. |
| Early Active vs. Late NAWM       | 1.153       | 0.534   |    |
| Early Chronic vs. Early Inactive | 1.042       | 0.870   |    |
| Early Chronic vs. Early NAWM     | 0.422       | 0.000   | a. |
| Early Chronic vs. Healthy        | 0.268       | 0.000   | a. |
| Early Chronic vs. Late Active    | 0.142       | 0.000   | a. |
| Early Chronic vs. Late Chronic   | 0.416       | 0.000   | a. |
| Early Chronic vs. Late Inactive  | 0.417       | 0.000   | a. |
| Early Chronic vs. Late NAWM      | 0.236       | 0.000   | a. |
| Early Inactive vs. Early NAWM    | 0.405       | 0.000   | a. |
| Early Inactive vs. Healthy       | 0.257       | 0.000   | a. |
| Early Inactive vs. Late Active   | 0.136       | 0.000   | a. |
| Early Inactive vs. Late Chronic  | 0.399       | 0.000   | a. |
| Early Inactive vs. Late Inactive | 0.400       | 0.000   | a. |
| Early Inactive vs. Late NAWM     | 0.227       | 0.000   | a. |
| Early NAWM vs. Healthy           | 0.635       | 0.003   | b. |
| Early NAWM vs. Late Active       | 0.336       | 0.000   | a. |
| Early NAWM vs. Late Chronic      | 0.984       | 0.915   |    |
| Early NAWM vs. Late Inactive     | 0.987       | 0.947   |    |
| Early NAWM vs. Late NAWM         | 0.560       | 0.000   | a. |
| Healthy vs. Late Active          | 0.529       | 0.000   | a. |
| Healthy vs. Late Chronic         | 1.550       | 0.000   | a. |
| Healthy vs. Late Inactive        | 1.555       | 0.009   | c. |
| Healthy vs. Late NAWM            | 0.882       | 0.351   |    |
| Late Active vs. Late Chronic     | 2.928       | 0.000   | a. |
| Late Active vs. Late Inactive    | 2.937       | 0.000   | a. |
| Late Active vs. Late NAWM        | 1.666       | 0.004   | b. |
| Late Chronic vs. Late Inactive   | 1.003       | 0.984   |    |
| Late Chronic vs. Late NAWM       | 0.569       | 0.000   | a. |
| Late Inactive vs. Late NAWM      | 0.567       | 0.002   | b. |

\*\*\* CD73 \*\*\*

| Group          | Total area | Fold change | Std. Err. | z     | P> z     | [95% Conf. Interval] |    |
|----------------|------------|-------------|-----------|-------|----------|----------------------|----|
| Early Active   | 4.468581   | 1.148771    | 5.82      | 0.000 | 2.699883 | 7.395956             | a. |
| Early Chronic  | 1.516008   | .2726342    | 2.31      | 0.021 | 1.065673 | 2.156646             | d. |
| Early Inactive | 2.000545   | .5399186    | 2.57      | 0.010 | 1.178749 | 3.39528              | c. |

|               |  |          |          |        |              |          |          |    |
|---------------|--|----------|----------|--------|--------------|----------|----------|----|
| Early NAWM    |  | 1.798411 | .3158321 | 3.34   | <b>0.001</b> | 1.274686 | 2.537317 | a. |
| Late Active   |  | 14.19547 | 3.405928 | 11.06  | <b>0.000</b> | 8.869935 | 22.71847 | a. |
| Late Chronic  |  | 6.176943 | .8666677 | 12.98  | <b>0.000</b> | 4.69185  | 8.132106 | a. |
| Late Inactive |  | 3.828069 | .7508991 | 6.84   | <b>0.000</b> | 2.606221 | 5.622741 | a. |
| Late NAWM     |  | 5.886447 | .9277811 | 11.25  | <b>0.000</b> | 4.322079 | 8.017034 | a. |
| _cons         |  | .0009506 | .0000943 | -70.14 | 0.000        | .0007826 | .0011546 |    |

---

|                                  | <b>Fold-change</b> | <b>P-value</b> |    |
|----------------------------------|--------------------|----------------|----|
| Early Active vs. Early Chronic   | 2.948              | <b>0.000</b>   | a. |
| Early Active vs. Early Inactive  | 2.234              | <b>0.020</b>   | d. |
| Early Active vs. Early NAWM      | 2.485              | <b>0.001</b>   | a. |
| Early Active vs. Healthy         | 4.469              | <b>0.000</b>   | a. |
| Early Active vs. Late Active     | 0.315              | <b>0.000</b>   | a. |
| Early Active vs. Late Chronic    | 0.723              | 0.208          |    |
| Early Active vs. Late Inactive   | 1.167              | 0.595          |    |
| Early Active vs. Late NAWM       | 0.759              | 0.302          |    |
| Early Chronic vs. Early Inactive | 0.758              | 0.343          |    |
| Early Chronic vs. Early NAWM     | 0.843              | 0.413          |    |
| Early Chronic vs. Healthy        | 1.516              | <b>0.021</b>   | d. |
| Early Chronic vs. Late Active    | 0.107              | <b>0.000</b>   | a. |
| Early Chronic vs. Late Chronic   | 0.245              | <b>0.000</b>   | a. |
| Early Chronic vs. Late Inactive  | 0.396              | <b>0.000</b>   | a. |
| Early Chronic vs. Late NAWM      | 0.258              | <b>0.000</b>   | a. |
| Early Inactive vs. Early NAWM    | 1.112              | 0.713          |    |
| Early Inactive vs. Healthy       | 2.001              | <b>0.010</b>   | c. |
| Early Inactive vs. Late Active   | 0.141              | <b>0.000</b>   | a. |
| Early Inactive vs. Late Chronic  | 0.324              | <b>0.000</b>   | a. |
| Early Inactive vs. Late Inactive | 0.523              | <b>0.032</b>   | d. |
| Early Inactive vs. Late NAWM     | 0.340              | <b>0.000</b>   | a. |
| Early NAWM vs. Healthy           | 1.798              | <b>0.001</b>   | a. |
| Early NAWM vs. Late Active       | 0.127              | <b>0.000</b>   | a. |
| Early NAWM vs. Late Chronic      | 0.291              | <b>0.000</b>   | a. |
| Early NAWM vs. Late Inactive     | 0.470              | <b>0.001</b>   | a. |
| Early NAWM vs. Late NAWM         | 0.306              | <b>0.000</b>   | a. |
| Healthy vs. Late Active          | 0.070              | <b>0.000</b>   | a. |
| Healthy vs. Late Chronic         | 0.162              | <b>0.000</b>   | a. |
| Healthy vs. Late Inactive        | 0.261              | <b>0.000</b>   | a. |
| Healthy vs. Late NAWM            | 0.170              | <b>0.000</b>   | a. |
| Late Active vs. Late Chronic     | 2.298              | <b>0.001</b>   | a. |
| Late Active vs. Late Inactive    | 3.708              | <b>0.000</b>   | a. |
| Late Active vs. Late NAWM        | 2.412              | <b>0.000</b>   | a. |
| Late Chronic vs. Late Inactive   | 1.614              | <b>0.015</b>   | d. |
| Late Chronic vs. Late NAWM       | 1.049              | 0.760          |    |
| Late Inactive vs. Late NAWM      | 0.650              | <b>0.039</b>   | d. |

\*\*\* CD271 \*\*\*

| Group          | Total area | Fold change | Std. Err. | z            | P> z     | [95% Conf. Interval] |
|----------------|------------|-------------|-----------|--------------|----------|----------------------|
| Early Chronic  | 1.403128   | .51101      | 0.93      | 0.352        | .6872195 | 2.864833             |
| Early Inactive | 2.16863    | 1.122012    | 1.50      | 0.135        | .786662  | 5.978367             |
| Early NAWM     | .0885399   | .0298084    | -7.20     | <b>0.000</b> | .0457687 | .1712813 a.          |
| Late Active    | 20.0682    | 7.399785    | 8.13      | <b>0.000</b> | 9.741896 | 41.34029 a.          |
| Late Chronic   | 11.10105   | 2.9859      | 8.95      | <b>0.000</b> | 6.55258  | 18.80683 a.          |
| Late Inactive  | 2.392155   | .8995462    | 2.32      | <b>0.020</b> | 1.144731 | 4.998909 a.          |
| Late NAWM      | .9238576   | .2791448    | -0.26     | 0.793        | .5109911 | 1.670309             |
| _cons          | .0001387   | .0000264    | -46.71    | 0.000        | .0000955 | .0002013             |

|                                  | Fold-change | P-value         |
|----------------------------------|-------------|-----------------|
| Early Chronic vs. Early Inactive | 0.647       | 0.447           |
| Early Chronic vs. Early NAWM     | 15.847      | <b>0.000</b> a. |
| Early Chronic vs. Healthy        | 1.403       | 0.352           |
| Early Chronic vs. Late Active    | 0.070       | <b>0.000</b> a. |
| Early Chronic vs. Late Chronic   | 0.126       | <b>0.000</b> a. |
| Early Chronic vs. Late Inactive  | 0.587       | 0.235           |
| Early Chronic vs. Late NAWM      | 1.519       | 0.283           |
| Early Inactive vs. Early NAWM    | 24.493      | <b>0.000</b> a. |
| Early Inactive vs. Healthy       | 2.169       | 0.135           |
| Early Inactive vs. Late Active   | 0.108       | <b>0.000</b> a. |
| Early Inactive vs. Late Chronic  | 0.195       | <b>0.002</b> b. |
| Early Inactive vs. Late Inactive | 0.907       | 0.866           |
| Early Inactive vs. Late NAWM     | 2.347       | 0.111           |
| Early NAWM vs. Healthy           | 0.089       | <b>0.000</b> a. |
| Early NAWM vs. Late Active       | 0.004       | <b>0.000</b> a. |
| Early NAWM vs. Late Chronic      | 0.008       | <b>0.000</b> a. |
| Early NAWM vs. Late Inactive     | 0.037       | <b>0.000</b> a. |
| Early NAWM vs. Late NAWM         | 0.096       | <b>0.000</b> a. |
| Healthy vs. Late Active          | 0.050       | <b>0.000</b> a. |
| Healthy vs. Late Chronic         | 0.090       | <b>0.000</b> a. |
| Healthy vs. Late Inactive        | 0.418       | <b>0.020</b> d. |
| Healthy vs. Late NAWM            | 1.082       | 0.793           |
| Late Active vs. Late Chronic     | 1.808       | 0.108           |
| Late Active vs. Late Inactive    | 8.389       | <b>0.000</b> a. |
| Late Active vs. Late NAWM        | 21.722      | <b>0.000</b> a. |
| Late Chronic vs. Late Inactive   | 4.641       | <b>0.000</b> a. |
| Late Chronic vs. Late NAWM       | 12.016      | <b>0.000</b> a. |
| Late Inactive vs. Late NAWM      | 2.589       | <b>0.018</b> d. |

Note: Early Active lesions were excluded from the image analysis due to high background staining of oligodendrocytes throughout the lesions.

\*\*\* KI67 \*\*\*

|                | Total area | Fold change | Std. Err. | z            | P> z     | [95% Conf. Interval] |    |
|----------------|------------|-------------|-----------|--------------|----------|----------------------|----|
| Group          |            |             |           |              |          |                      |    |
| Early Active   | .3901531   | .1597433    | -2.30     | <b>0.022</b> | .1748724 | .8704601             | d. |
| Early Chronic  | .5528941   | .1591559    | -2.06     | <b>0.040</b> | .3144962 | .9720052             | d. |
| Early Inactive | .5142577   | .2210468    | -1.55     | 0.122        | .221464  | 1.194149             |    |
| Early NAWM     | .3168122   | .0890188    | -4.09     | <b>0.000</b> | .1826539 | .5495091             | a. |
| Late Active    | 1.834125   | .5618634    | 1.98      | <b>0.048</b> | 1.006173 | 3.343373             | d. |
| Late Chronic   | 1.885494   | .4213353    | 2.84      | <b>0.005</b> | 1.216787 | 2.921703             | b. |
| Late Inactive  | .6808867   | .2127161    | -1.23     | 0.219        | .3691056 | 1.256027             |    |
| Late NAWM      | .8947775   | .224611     | -0.44     | 0.658        | .5470698 | 1.463482             |    |
| _cons          | .0004497   | .0000711    | -48.77    | 0.000        | .0003299 | .000613              |    |

|                                  | Fold-change | P-value      |    |
|----------------------------------|-------------|--------------|----|
| Early Active vs. Early Chronic   | 0.706       | 0.436        |    |
| Early Active vs. Early Inactive  | 0.759       | 0.616        |    |
| Early Active vs. Early NAWM      | 1.231       | 0.639        |    |
| Early Active vs. Healthy         | 0.390       | <b>0.022</b> | d. |
| Early Active vs. Late Active     | 0.213       | <b>0.001</b> | b. |
| Early Active vs. Late Chronic    | 0.207       | <b>0.000</b> | a. |
| Early Active vs. Late Inactive   | 0.573       | 0.230        |    |
| Early Active vs. Late NAWM       | 0.436       | 0.051        |    |
| Early Chronic vs. Early Inactive | 1.075       | 0.877        |    |
| Early Chronic vs. Early NAWM     | 1.745       | 0.096        |    |
| Early Chronic vs. Healthy        | 0.553       | <b>0.040</b> | d. |
| Early Chronic vs. Late Active    | 0.301       | <b>0.001</b> | b. |
| Early Chronic vs. Late Chronic   | 0.293       | <b>0.000</b> | a. |
| Early Chronic vs. Late Inactive  | 0.812       | 0.564        |    |
| Early Chronic vs. Late NAWM      | 0.618       | 0.120        |    |
| Early Inactive vs. Early NAWM    | 1.623       | 0.295        |    |
| Early Inactive vs. Healthy       | 0.514       | 0.122        |    |
| Early Inactive vs. Late Active   | 0.280       | <b>0.008</b> | c. |
| Early Inactive vs. Late Chronic  | 0.273       | <b>0.003</b> | b. |
| Early Inactive vs. Late Inactive | 0.755       | 0.560        |    |
| Early Inactive vs. Late NAWM     | 0.575       | 0.213        |    |
| Early NAWM vs. Healthy           | 0.317       | <b>0.000</b> | a. |
| Early NAWM vs. Late Active       | 0.173       | <b>0.000</b> | a. |
| Early NAWM vs. Late Chronic      | 0.168       | <b>0.000</b> | a. |
| Early NAWM vs. Late Inactive     | 0.465       | <b>0.032</b> | d. |
| Early NAWM vs. Late NAWM         | 0.354       | <b>0.001</b> | a. |
| Healthy vs. Late Active          | 0.545       | <b>0.048</b> | d. |
| Healthy vs. Late Chronic         | 0.530       | <b>0.005</b> | b. |
| Healthy vs. Late Inactive        | 1.469       | 0.219        |    |
| Healthy vs. Late NAWM            | 1.118       | 0.658        |    |
| Late Active vs. Late Chronic     | 0.973       | 0.928        |    |
| Late Active vs. Late Inactive    | 2.694       | <b>0.008</b> | c. |

|                                |       |              |    |
|--------------------------------|-------|--------------|----|
| Late Active vs. Late NAWM      | 2.050 | <b>0.028</b> | d. |
| Late Chronic vs. Late Inactive | 2.769 | <b>0.001</b> | a. |
| Late Chronic vs. Late NAWM     | 2.107 | <b>0.003</b> | b. |
| Late Inactive vs. Late NAWM    | 0.761 | 0.412        |    |

**\*\*\* CD31 \*\*\***

| CD31 Group     | Coef.     | Std. Err. | z     | P> z         | [95% Conf. Interval] |              |
|----------------|-----------|-----------|-------|--------------|----------------------|--------------|
| Early Active   | 1.991578  | 1.247612  | 1.60  | 0.110        | -.4536964            | 4.436852     |
| Early Chronic  | -.4909143 | .8404326  | -0.58 | 0.559        | -2.138132            | 1.156303     |
| Early Inactive | -3.2522   | 1.111788  | -2.93 | <b>0.003</b> | -5.431264            | -1.073136 b. |
| Early NAWM     | -.4928667 | .8286777  | -0.59 | 0.552        | -2.117045            | 1.131312     |
| Late Active    | 7.169838  | .8948329  | 8.01  | <b>0.000</b> | 5.415997             | 8.923678 a.  |
| Late Chronic   | 2.1339    | .7861527  | 2.71  | <b>0.007</b> | .5930691             | 3.674731 c.  |
| Late Inactive  | -1.732018 | .8868998  | -1.95 | 0.051        | -3.47031             | .0062735     |
| Late NAWM      | 5.639705  | .7798884  | 7.23  | <b>0.000</b> | 4.111152             | 7.168258 a.  |
| _cons          | 8.7862    | .641891   | 13.69 | 0.000        | 7.528117             | 10.04428     |

|                                  | Estimate | P-value         |
|----------------------------------|----------|-----------------|
| Early Active vs. Early Chronic   | 2.482    | 0.038           |
| Early Active vs. Early Inactive  | 5.244    | <b>0.000</b> a. |
| Early Active vs. Early NAWM      | 2.484    | <b>0.037</b> d. |
| Early Active vs. Healthy         | 1.992    | 0.110           |
| Early Active vs. Late Active     | -5.178   | <b>0.000</b> a. |
| Early Active vs. Late Chronic    | -0.142   | 0.903           |
| Early Active vs. Late Inactive   | 3.724    | <b>0.003</b> b. |
| Early Active vs. Late NAWM       | -3.648   | <b>0.002</b> b. |
| Early Chronic vs. Early Inactive | 2.761    | <b>0.009</b> c. |
| Early Chronic vs. Early NAWM     | 0.002    | 0.998           |
| Early Chronic vs. Healthy        | -0.491   | 0.559           |
| Early Chronic vs. Late Active    | -7.661   | <b>0.000</b> a. |
| Early Chronic vs. Late Chronic   | -2.625   | <b>0.000</b> a. |
| Early Chronic vs. Late Inactive  | 1.241    | 0.129           |
| Early Chronic vs. Late NAWM      | -6.131   | <b>0.000</b> a. |
| Early Inactive vs. Early NAWM    | -2.759   | <b>0.008</b> c. |
| Early Inactive vs. Healthy       | -3.252   | <b>0.003</b> b. |
| Early Inactive vs. Late Active   | -10.422  | <b>0.000</b> a. |
| Early Inactive vs. Late Chronic  | -5.386   | <b>0.000</b> a. |

|                                  |        |                 |
|----------------------------------|--------|-----------------|
| Early Inactive vs. Late Inactive | -1.520 | 0.165           |
| Early Inactive vs. Late NAWM     | -8.892 | <b>0.000</b> a. |
| Early NAWM vs. Healthy           | -0.493 | 0.552           |
| Early NAWM vs. Late Active       | -7.663 | <b>0.000</b> a. |
| Early NAWM vs. Late Chronic      | -2.627 | <b>0.000</b> a. |
| Early NAWM vs. Late Inactive     | 1.239  | 0.124           |
| Early NAWM vs. Late NAWM         | -6.133 | <b>0.000</b> a. |
| Healthy vs. Late Active          | -7.170 | <b>0.000</b> a. |
| Healthy vs. Late Chronic         | -2.134 | <b>0.007</b> c. |
| Healthy vs. Late Inactive        | 1.732  | 0.051           |
| Healthy vs. Late NAWM            | -5.640 | <b>0.000</b> a. |
| Late Active vs. Late Chronic     | 5.036  | <b>0.000</b> a. |
| Late Active vs. Late Inactive    | 8.902  | <b>0.000</b> a. |
| Late Active vs. Late NAWM        | 1.530  | <b>0.045</b> d. |
| Late Chronic vs. Late Inactive   | 3.866  | <b>0.000</b> a. |
| Late Chronic vs. Late NAWM       | -3.506 | <b>0.000</b> a. |
| Late Inactive vs. Late NAWM      | -7.372 | <b>0.000</b> a. |

\*\*\*  $\alpha$ -SMA \*\*\*

|                | $\alpha$ -SMA | Coef.     | Std. Err. | z     | P> z         | [95% Conf. Interval] |             |
|----------------|---------------|-----------|-----------|-------|--------------|----------------------|-------------|
| Group          |               |           |           |       |              |                      |             |
| Early Active   |               | .3772714  | .3965605  | 0.95  | 0.341        | -.3999728            | 1.154516    |
| Early Chronic  |               | .2026286  | .3110876  | 0.65  | 0.515        | -.407092             | .8123491    |
| Early Inactive |               | -.0338    | .4115303  | -0.08 | 0.935        | -.8403845            | .7727845    |
| Early NAWM     |               | -.3227333 | .3067365  | -1.05 | 0.293        | -.9239259            | .2784592    |
| Late Active    |               | 1.044502  | .331224   | 3.15  | <b>0.002</b> | .3953148             | 1.693689 b. |
| Late Chronic   |               | .4992     | .2909958  | 1.72  | 0.086        | -.0711413            | 1.069541    |
| Late Inactive  |               | .7794727  | .3282876  | 2.37  | <b>0.018</b> | .1360409             | 1.422905 d. |
| Late NAWM      |               | 1.116295  | .2886771  | 3.87  | <b>0.000</b> | .5504985             | 1.682092 a. |
| _cons          |               | 1.7538    | .2375971  | 7.38  | 0.000        | 1.288118             | 2.219482    |

|                                 | Estimate | P-value |
|---------------------------------|----------|---------|
| Early Active vs. Early Chronic  | 0.175    | 0.642   |
| Early Active vs. Early Inactive | 0.411    | 0.374   |
| Early Active vs. Early NAWM     | 0.700    | 0.060   |
| Early Active vs. Healthy        | 0.377    | 0.341   |
| Early Active vs. Late Active    | -0.667   | 0.089   |



|                                  |        |                 |
|----------------------------------|--------|-----------------|
| Early Active vs. Late Chronic    | -0.122 | 0.734           |
| Early Active vs. Late Inactive   | -0.402 | 0.302           |
| Early Active vs. Late NAWM       | -0.739 | 0.039           |
| Early Chronic vs. Early Inactive | 0.236  | 0.546           |
| Early Chronic vs. Early NAWM     | 0.525  | 0.060           |
| Early Chronic vs. Healthy        | 0.203  | 0.515           |
| Early Chronic vs. Late Active    | -0.842 | <b>0.006</b> c. |
| Early Chronic vs. Late Chronic   | -0.297 | 0.257           |
| Early Chronic vs. Late Inactive  | -0.577 | 0.057           |
| Early Chronic vs. Late NAWM      | -0.914 | <b>0.000</b> a. |
| Early Inactive vs. Early NAWM    | 0.289  | 0.456           |
| Early Inactive vs. Healthy       | -0.034 | 0.935           |
| Early Inactive vs. Late Active   | -1.078 | <b>0.008</b> c. |
| Early Inactive vs. Late Chronic  | -0.533 | 0.156           |
| Early Inactive vs. Late Inactive | -0.813 | <b>0.045</b> d. |
| Early Inactive vs. Late NAWM     | -1.150 | <b>0.002</b> c. |
| Early NAWM vs. Healthy           | -0.323 | 0.293           |
| Early NAWM vs. Late Active       | -1.367 | <b>0.000</b> a. |
| Early NAWM vs. Late Chronic      | -0.822 | <b>0.001</b> a. |
| Early NAWM vs. Late Inactive     | -1.102 | <b>0.000</b> a. |
| Early NAWM vs. Late NAWM         | -1.439 | <b>0.000</b> a. |
| Healthy vs. Late Active          | -1.045 | <b>0.002</b> a. |
| Healthy vs. Late Chronic         | -0.499 | 0.086           |
| Healthy vs. Late Inactive        | -0.779 | <b>0.018</b> d. |
| Healthy vs. Late NAWM            | -1.116 | <b>0.000</b> a. |
| Late Active vs. Late Chronic     | 0.545  | 0.056           |
| Late Active vs. Late Inactive    | 0.265  | 0.412           |
| Late Active vs. Late NAWM        | -0.072 | 0.800           |
| Late Chronic vs. Late Inactive   | -0.280 | 0.320           |
| Late Chronic vs. Late NAWM       | -0.617 | <b>0.009</b> c. |
| Late Inactive vs. Late NAWM      | -0.337 | 0.228           |

**\*\*\* Capillaries (defined as CD31 -  $\alpha$ -SMA) \*\*\***

| Group          | Coef.     | Std. Err. | z     | P> z         | [95% Conf. Interval] |
|----------------|-----------|-----------|-------|--------------|----------------------|
| Early Active   | 1.578711  | 1.264208  | 1.25  | 0.212        | - .8990906 4.056513  |
| Early Chronic  | -.6935428 | .8516122  | -0.81 | 0.415        | -2.362672 .9755863   |
| Early Inactive | -3.2184   | 1.126577  | -2.86 | <b>0.004</b> | -5.42645 -1.01035 b. |

|               |  |           |          |       |              |           |              |
|---------------|--|-----------|----------|-------|--------------|-----------|--------------|
| Early NAWM    |  | -.1701333 | .8397009 | -0.20 | 0.839        | -1.815917 | 1.47565      |
| Late Active   |  | 6.125336  | .9067361 | 6.76  | <b>0.000</b> | 4.348166  | 7.902506 a.  |
| Late Chronic  |  | 1.6347    | .7966102 | 2.05  | <b>0.040</b> | .0733726  | 3.196027 d.  |
| Late Inactive |  | -2.511491 | .8986975 | -2.79 | <b>0.005</b> | -4.272906 | -.7500761 b. |
| Late NAWM     |  | 4.52341   | .7902626 | 5.72  | <b>0.000</b> | 2.974523  | 6.072296 a.  |
| _cons         |  | 7.0324    | .6504295 | 10.81 | 0.000        | 5.757582  | 8.307218     |

---

|                                  | <b>Estimate</b> | <b>P-value</b>  |
|----------------------------------|-----------------|-----------------|
| Early Active vs. Early Chronic   | 2.272           | 0.062           |
| Early Active vs. Early Inactive  | 4.797           | <b>0.001</b> a. |
| Early Active vs. Early NAWM      | 1.749           | 0.147           |
| Early Active vs. Healthy         | 1.579           | 0.212           |
| Early Active vs. Late Active     | -4.547          | <b>0.000</b> a. |
| Early Active vs. Late Chronic    | -0.056          | 0.962           |
| Early Active vs. Late Inactive   | 4.090           | <b>0.001</b> a. |
| Early Active vs. Late NAWM       | -2.945          | <b>0.012</b> d. |
| Early Chronic vs. Early Inactive | 2.525           | <b>0.018</b> d. |
| Early Chronic vs. Early NAWM     | -0.523          | 0.493           |
| Early Chronic vs. Healthy        | -0.694          | 0.415           |
| Early Chronic vs. Late Active    | -6.819          | <b>0.000</b> a. |
| Early Chronic vs. Late Chronic   | -2.328          | <b>0.001</b> a. |
| Early Chronic vs. Late Inactive  | 1.818           | <b>0.028</b> d. |
| Early Chronic vs. Late NAWM      | -5.217          | <b>0.000</b> a. |
| Early Inactive vs. Early NAWM    | -3.048          | <b>0.004</b> b. |
| Early Inactive vs. Healthy       | -3.218          | <b>0.004</b> b. |
| Early Inactive vs. Late Active   | -9.344          | <b>0.000</b> a. |
| Early Inactive vs. Late Chronic  | -4.853          | <b>0.000</b> a. |
| Early Inactive vs. Late Inactive | -0.707          | 0.524           |
| Early Inactive vs. Late NAWM     | -7.742          | <b>0.000</b> a. |
| Early NAWM vs. Healthy           | -0.170          | 0.839           |
| Early NAWM vs. Late Active       | -6.295          | <b>0.000</b> a. |
| Early NAWM vs. Late Chronic      | -1.805          | <b>0.010</b> c. |
| Early NAWM vs. Late Inactive     | 2.341           | <b>0.004</b> b. |
| Early NAWM vs. Late NAWM         | -4.694          | <b>0.000</b> a. |
| Healthy vs. Late Active          | -6.125          | <b>0.000</b> a. |
| Healthy vs. Late Chronic         | -1.635          | <b>0.040</b> d. |
| Healthy vs. Late Inactive        | 2.511           | <b>0.005</b> c. |
| Healthy vs. Late NAWM            | -4.523          | <b>0.000</b> a. |
| Late Active vs. Late Chronic     | 4.491           | <b>0.000</b> a. |

|                                |        |          |
|--------------------------------|--------|----------|
| Late Active vs. Late Inactive  | 8.637  | 0.000 a. |
| Late Active vs. Late NAWM      | 1.602  | 0.039 d. |
| Late Chronic vs. Late Inactive | 4.146  | 0.000 a. |
| Late Chronic vs. Late NAWM     | -2.889 | 0.000 a. |
| Late Inactive vs. Late NAWM    | -7.035 | 0.000 a. |
